# Supplementary material for: Dietary Supplementation with Omega-3 Polyunsaturated Fatty Acids Reduces Opioid-Seeking Behaviors and Alters the Gut Microbiome
Source: MDPI journal article supplement (doi:10.3390/nu11081900), 2019-08-14
Supplement: s1 [file s1]

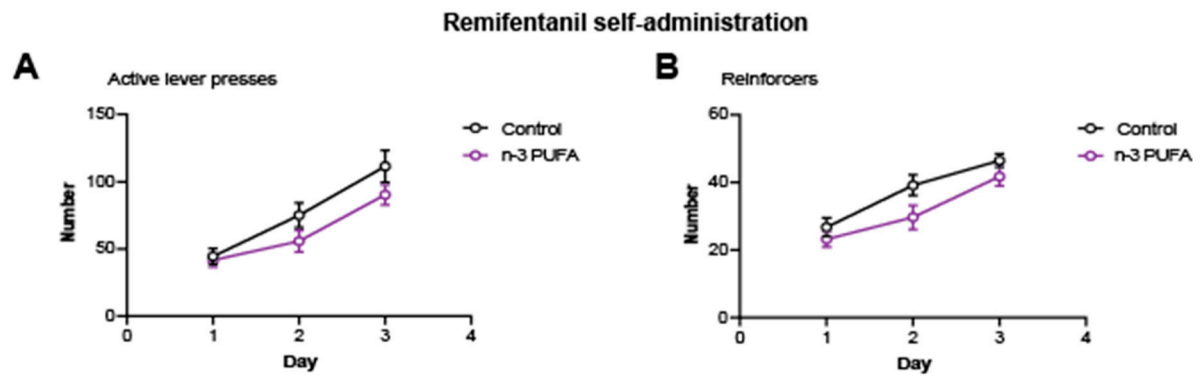

**Supplemental Figure S1. The acquisition of remifentanil self-administration.** (A) There was no effect of diet (control diet shown in black, n-3 PUFA diet shown in purple) in the initial acquisition of opioid self-administration using remifentanil as the RNFS when observing (A) AL presses ( $p=0.3$ ) or (B) RNFS earned ( $p=0.4$ ).
